# Supplementary material for: Research Progress on Elements of Wild Edible Mushrooms
Source: MDPI journal article supplement (doi:10.3390/jof8090964), 2022-09-15
Supplement: s1 [file s1]

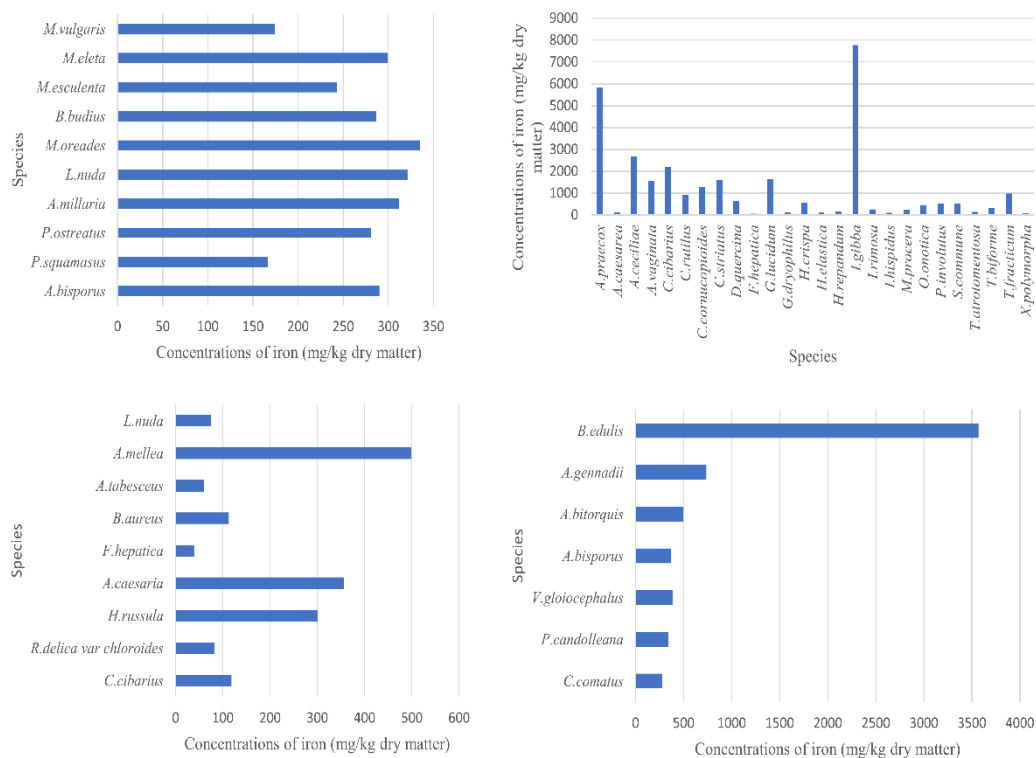

**Figure S1.** The comparative graph of iron content.

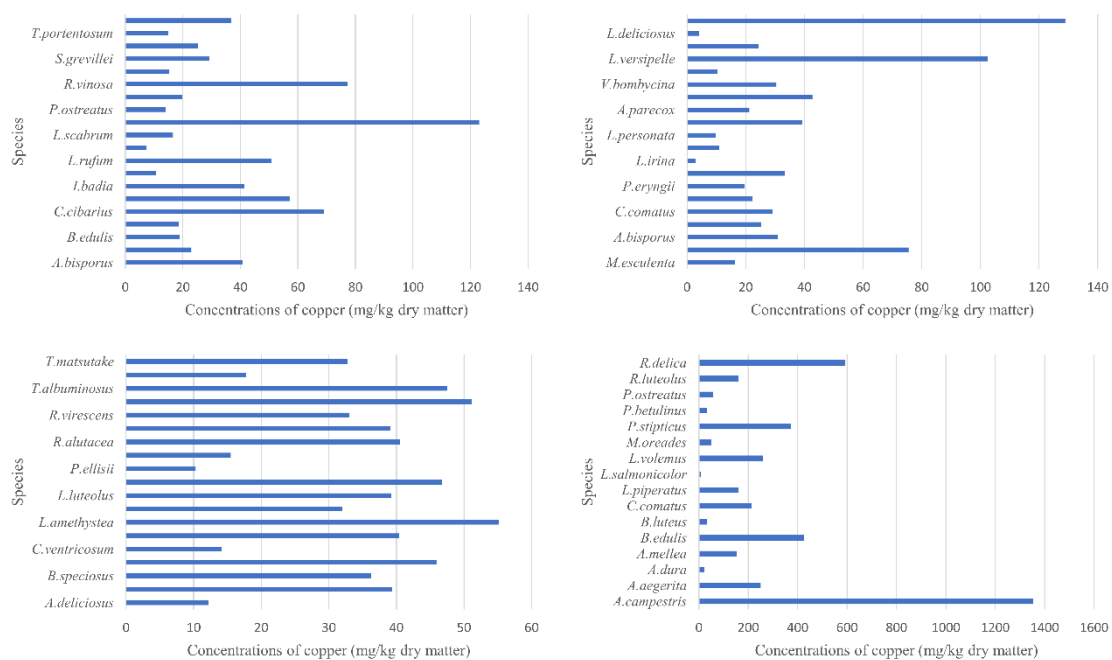

Figure S2. The comparative graph of copper content.

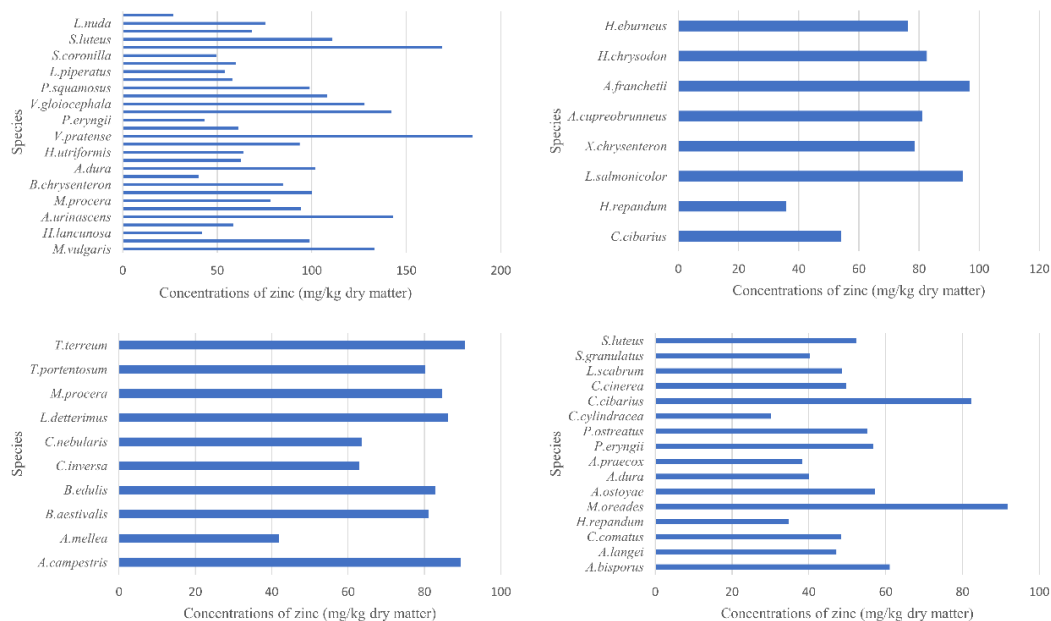

Figure S3. The comparative graph of zinc content.

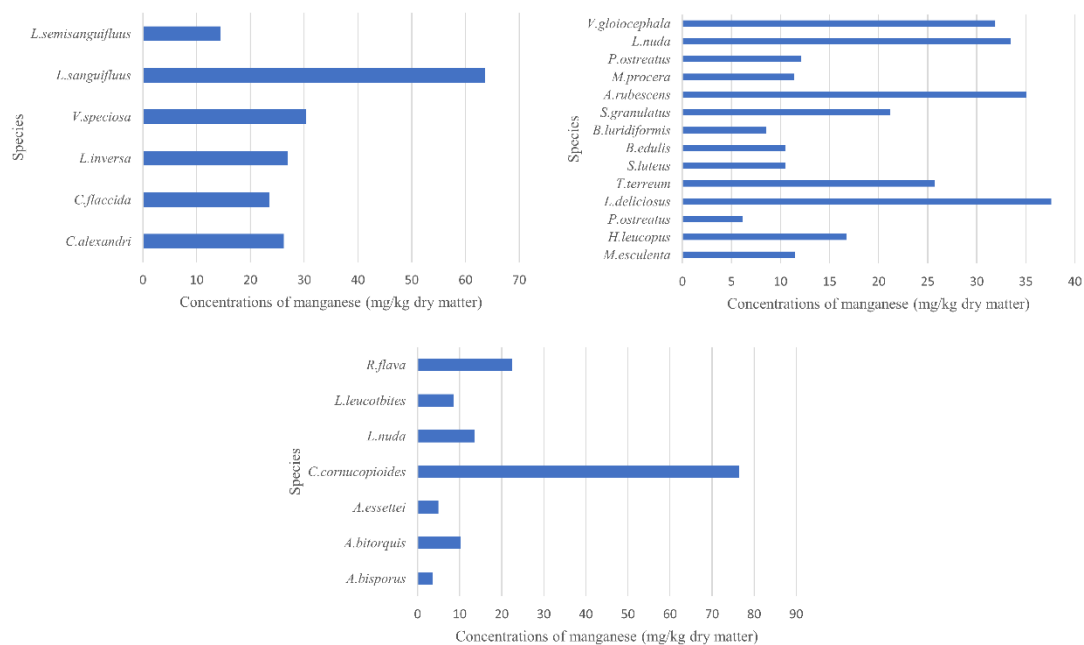

**Figure S4.** The comparative graph of manganese content.

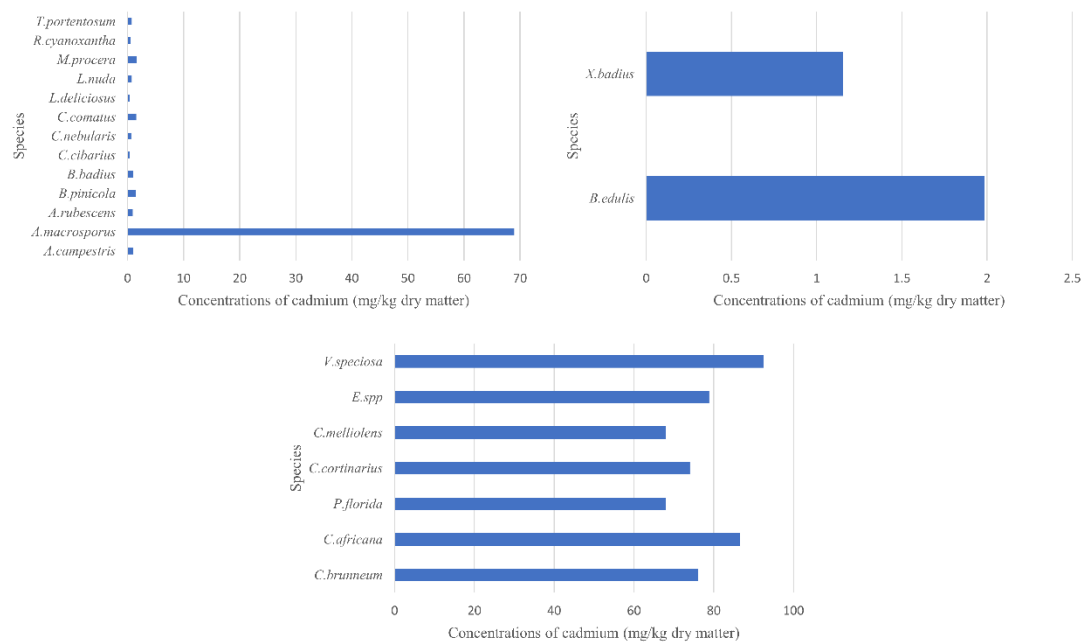

**Figure S5.** The comparative graph of cadmium content.

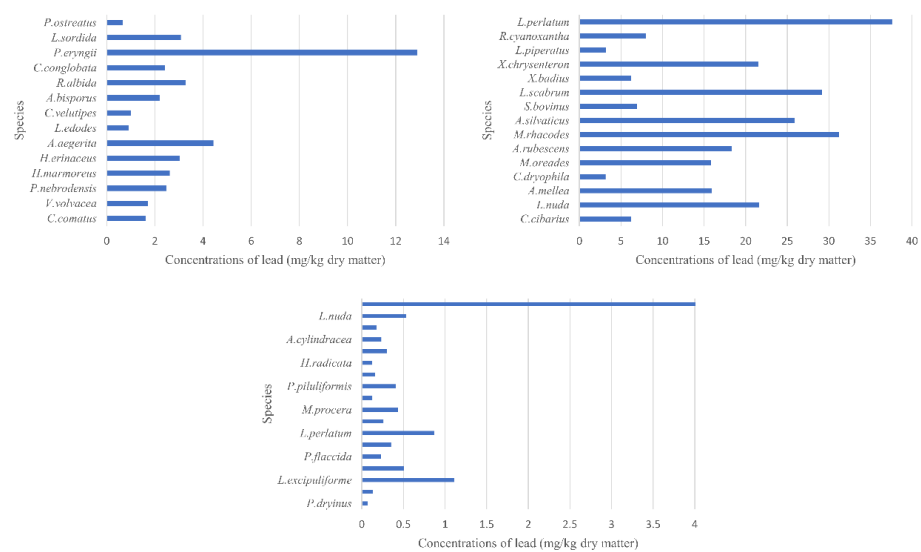

**Figure S6.** The comparative graph of lead content.

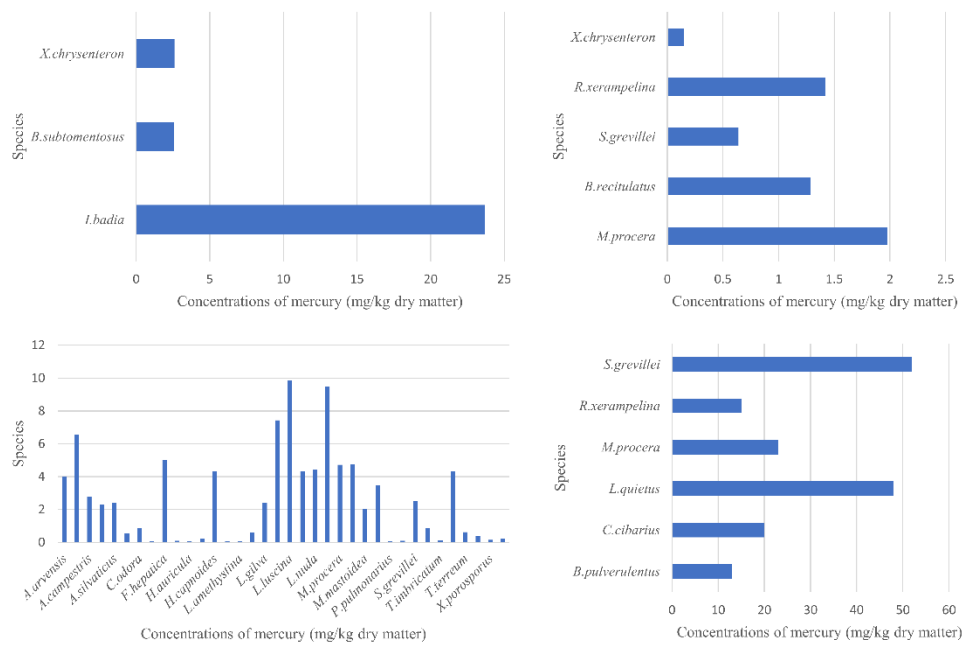

**Figure S7.** The comparative graph of mercury content.

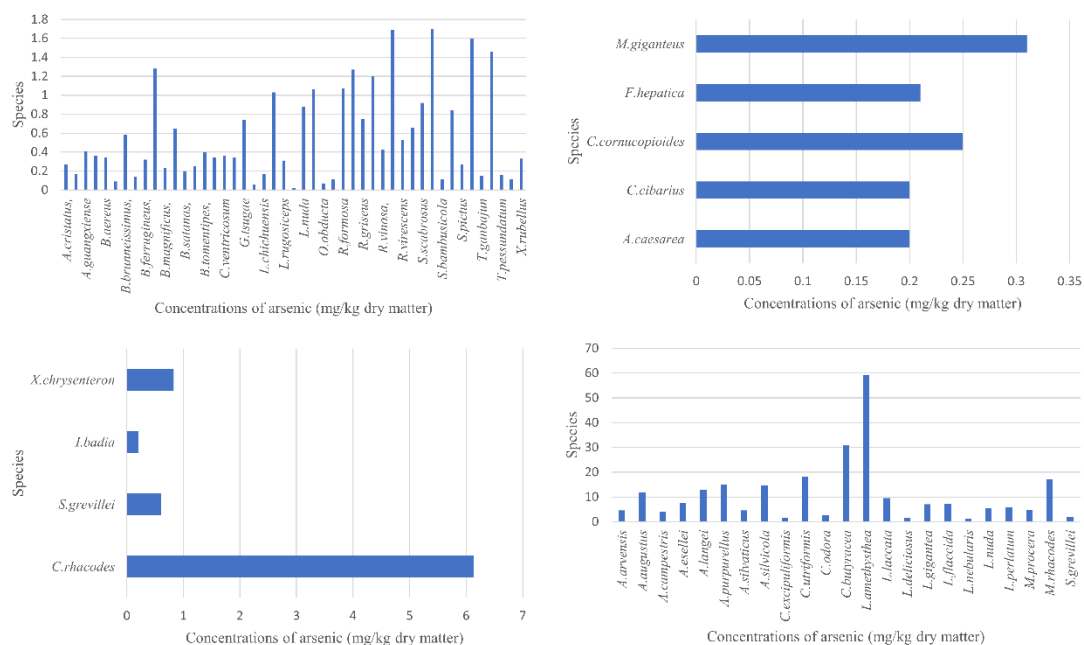

**Figure S8.** The comparative graph of arsenic content.
